# Supplementary figures and images for: Enhanced photocatalytic performance for nonoxidative coupling of methane over FeO x cluster decorated TiO 2
Source: Royal Society of Chemistry journal article supplement (doi:10.1039/d5cy01061f), 2025-12-02

**a**

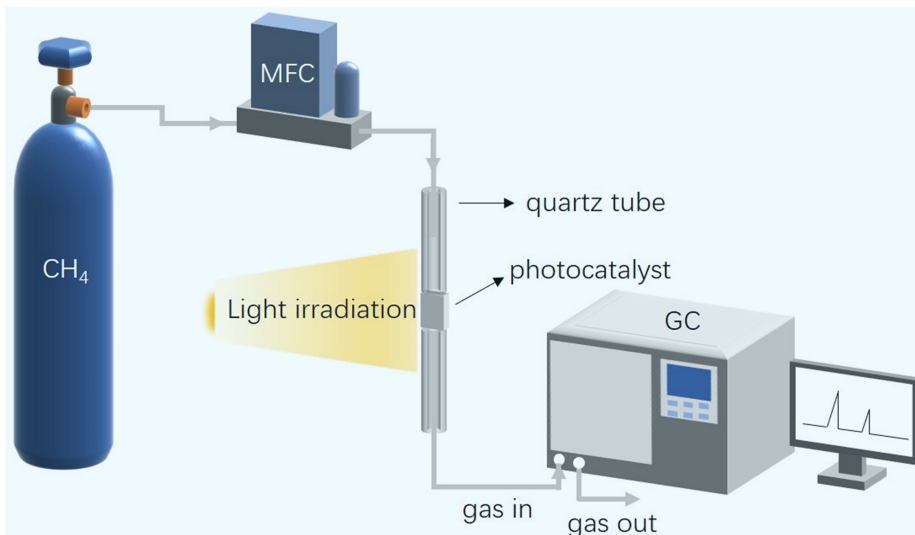

**b**

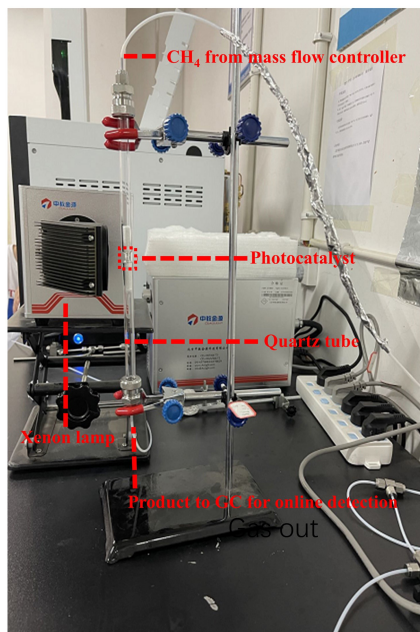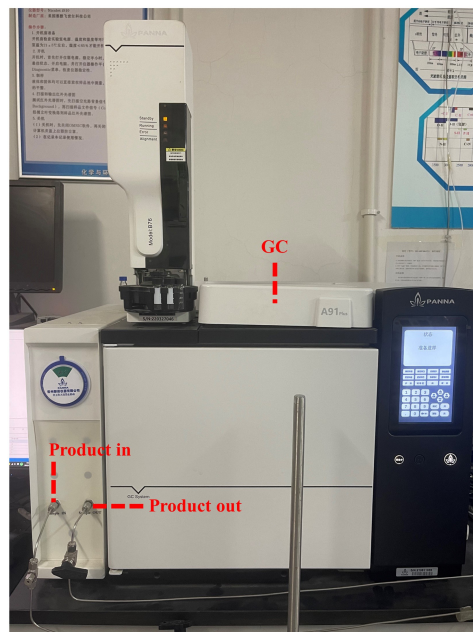

Supplement: d5cy01061f14.pdf [file d5cy01061f14.pdf]

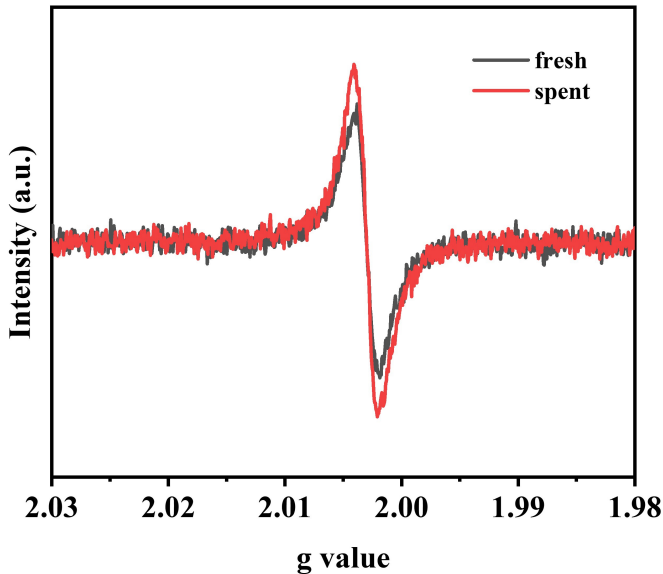

Supplement: d5cy01061f4.pdf [file d5cy01061f4.pdf]

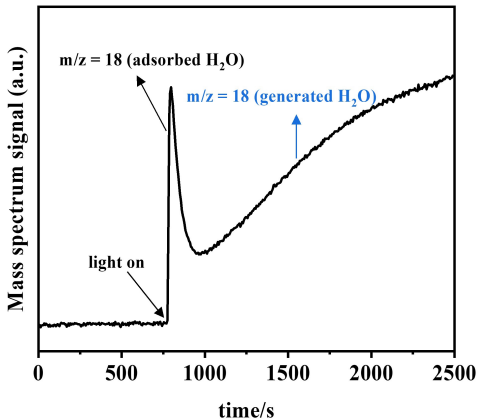

Supplement: d5cy01061f7.pdf [file d5cy01061f7.pdf]
